# Supplementary material for: Unraveling the Synthesis of SbCl(C3N6H4): A Metal-Melaminate Obtained through Deprotonation of Melamine with Antimony(III)Chloride
Source: MDPI journal article supplement (doi:10.3390/chemistry5020099), 2023-06-20
Supplement: s1 [file s1]

# Supplementary data

## Unraveling the Synthesis of $\text{SbCl}(\text{C}_3\text{N}_6\text{H}_3)$ : A Metal-Melamate Obtained through Deprotonation of Melamine with Antimony(III)Chloride

Elaheh Bayat, Markus Ströbele and Hans-Jürgen Meyer \*

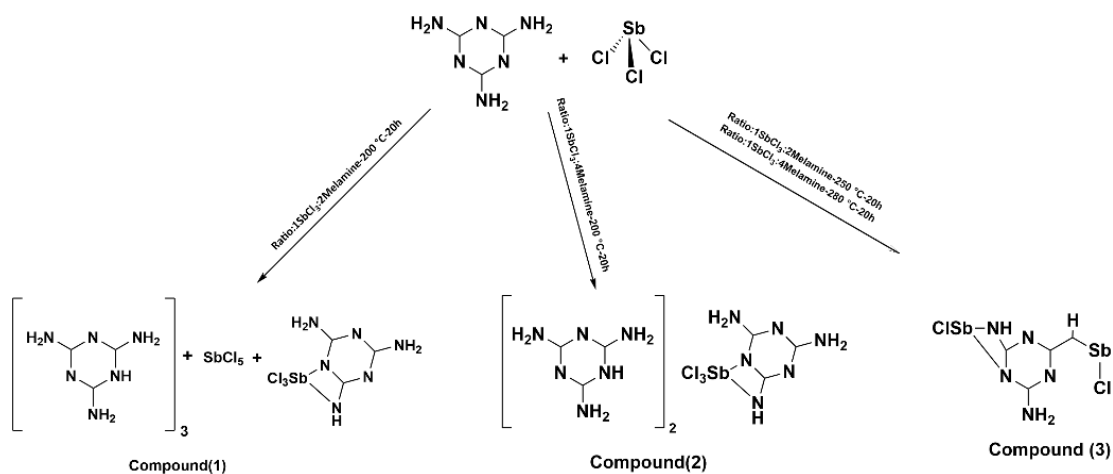

Figure S1: Schematic synthesis of three synthesized compounds ((1),(2),(3)).

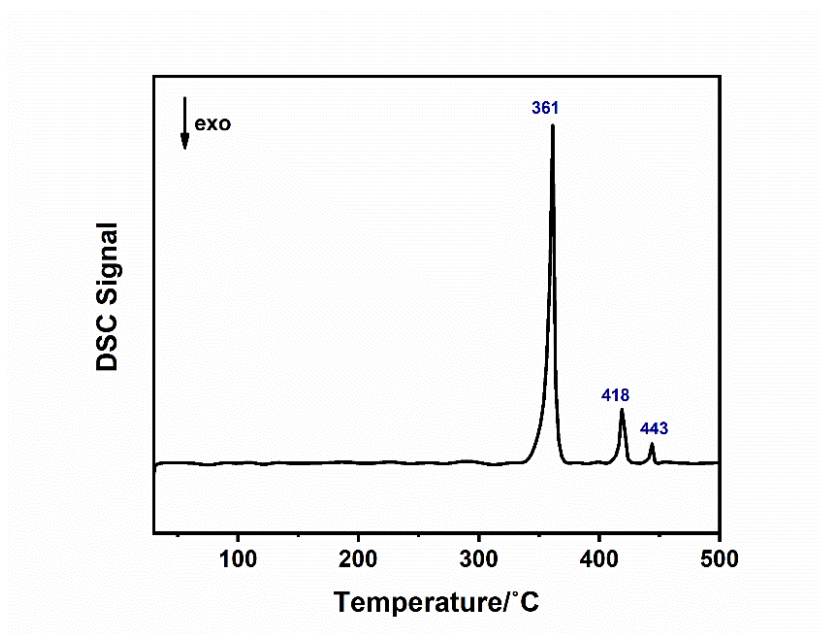

Figure S2: DSC pattern of pure Melamine.

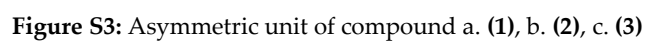

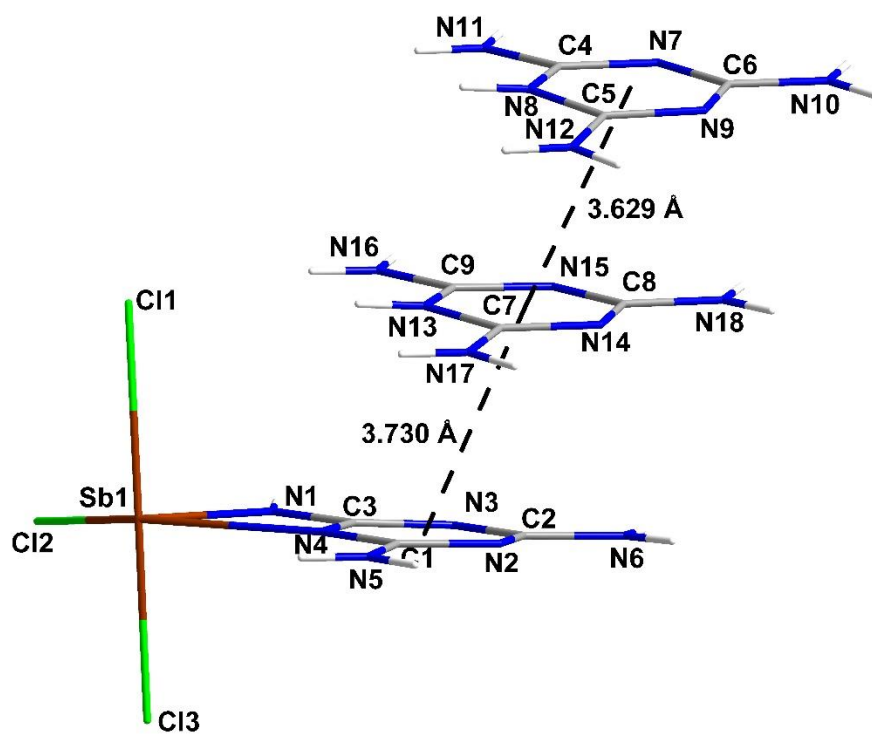

Figure S4: Stacking pattern of the  $C_3N_3$  units in compound (1).

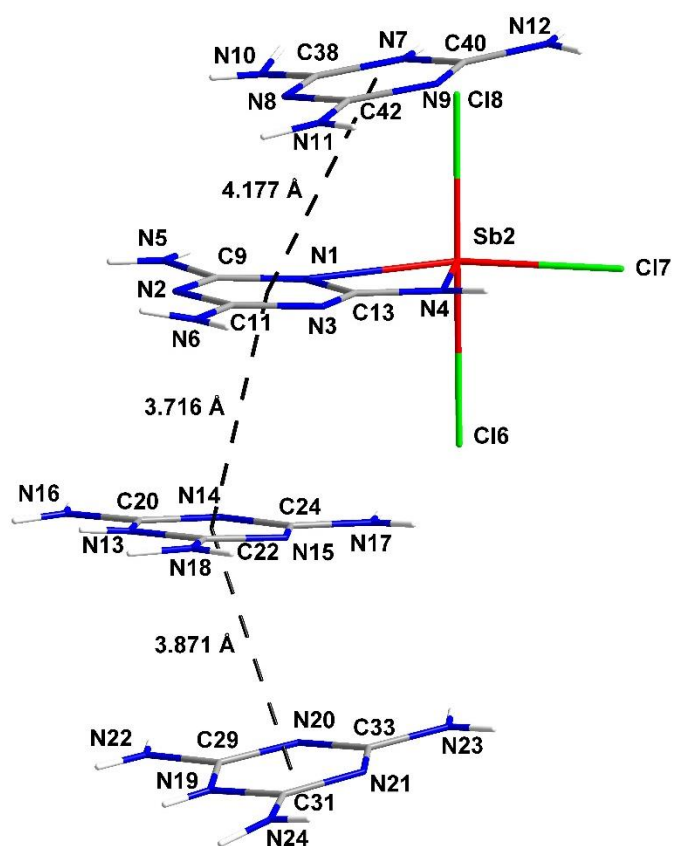

Figure S5: Stacking pattern of the  $C_3N_3$  units in compound (2).

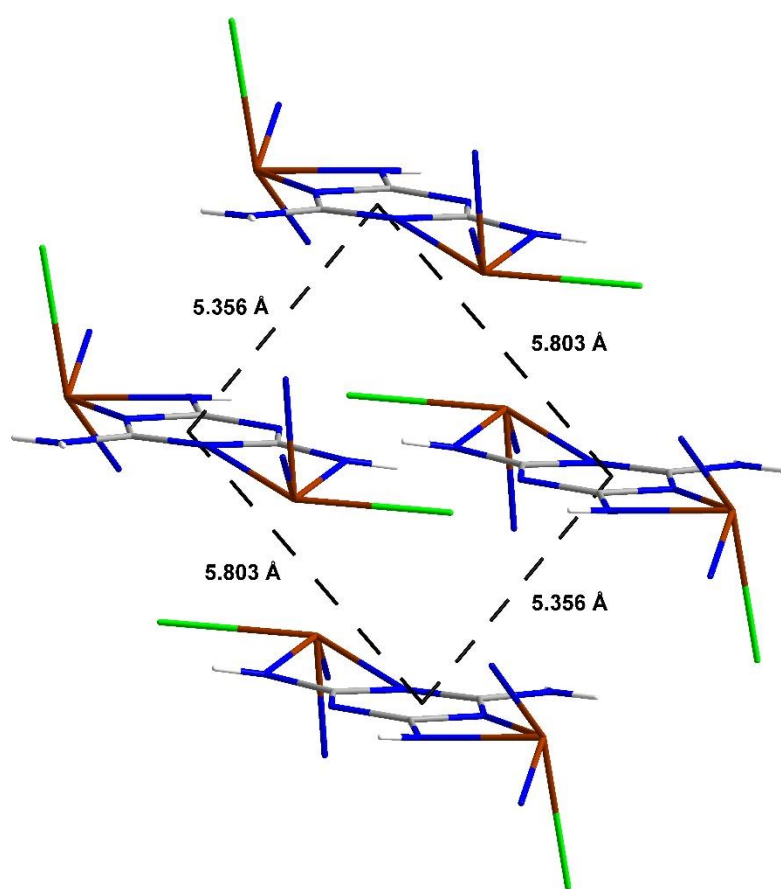

**Figure S6:** Stacking pattern of the  $C_3N_3$  units in compound (3).

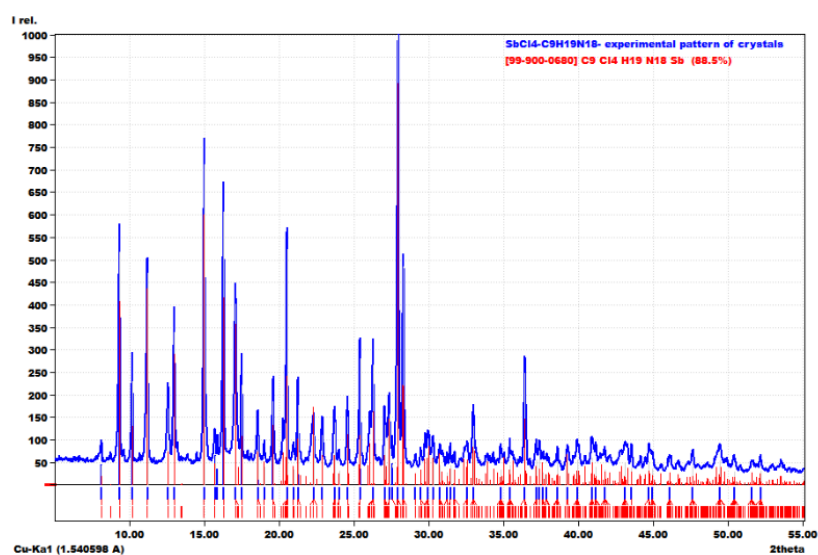

**Figure S7:** Comparison of the recorded powder pattern of (1) with the calculated pattern. Calculated (red) and recorded (blue)

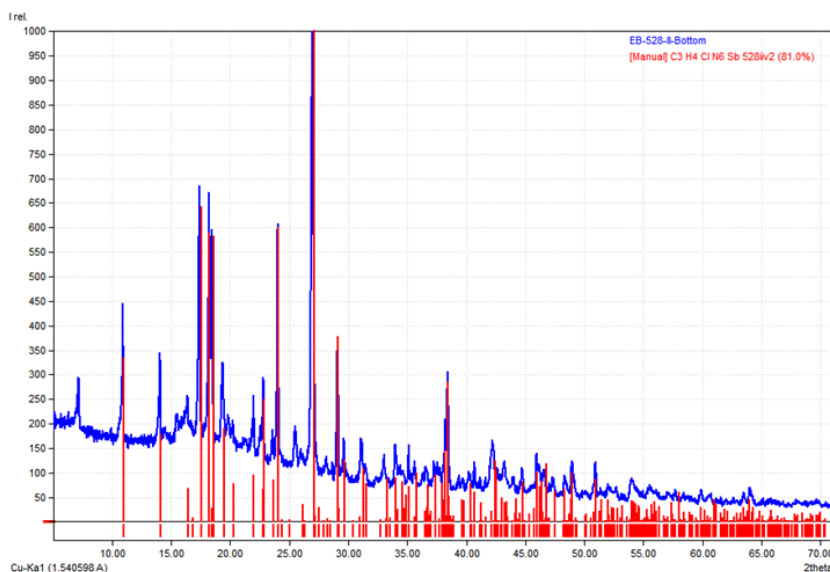

**Figure S8:** Comparison of the recorded powder pattern of (3) with the calculated pattern. Calculated (red) and recorded (blue)

**Table S1.** Assignment of recorded infrared wavenumbers ( $\text{cm}^{-1}$ ) of obtained compounds compared to those of melamine [1], and melaminium chloride [2].

| Melamine | Melaminium chloride[29] | Compound (1) | Compound (3) | Compound (4) | Tentative assignment                                                      |
|----------|-------------------------|--------------|--------------|--------------|---------------------------------------------------------------------------|
| 3471     | 3469                    | 3462         |              |              | NH <sub>2</sub> asym stretch                                              |
| 3421     | 3363                    | 3433         | 3342         | 3332         | NH <sub>2</sub> asym stretch                                              |
|          | 3363                    | 3370         | 3334         |              | N-H... Cl stretch                                                         |
| 3334     |                         | 3357         |              |              | NH <sub>2</sub> sym stretch                                               |
| 3180     |                         |              |              | 3147         | Combination tone:<br>NH <sub>2</sub> bend+ side chain<br>asym C-N stretch |
|          |                         | 3203         |              |              | N-H... N stretch                                                          |
| 3132     | 3120                    | 3157         | 3134         |              | N-H... N stretch                                                          |
|          |                         | 3116         | 3049         |              | N-H... N stretch                                                          |
|          | 2945                    |              |              |              | N-H... N stretch                                                          |
|          | 2734                    | 2785         |              |              | Combination tone:                                                         |
| 2677     | 2679                    | 2680         |              |              | NH <sub>2</sub> asym stretch side                                         |
| 2368     | 2356                    |              | 2364         | 2370         | chain out of plane C-N                                                    |
| 2198     | 2175                    |              |              |              | bend                                                                      |
|          | 1722                    |              |              |              | NH <sub>2</sub> bend                                                      |
|          | 1676                    | 1679         |              |              | NH <sub>2</sub> bend                                                      |
| 1652     | 1649                    | 1656         | 1639         | 1651         | NH <sub>2</sub> bend                                                      |
|          | 1620                    | 1612         | 1600         |              | Side chain asym C-N                                                       |
| 1554     | 1556                    | 1565         |              | 1510         | stretch                                                                   |
|          |                         | 1521         | 1515         | 1508         |                                                                           |
| 1465     |                         |              |              |              | Ring semi-circle<br>stretch                                               |
|          | 1492                    | 1487         | 1479         |              |                                                                           |
| 1438     | 1452                    | 1448         | 1375         | 1390         | Side chain C-N breath                                                     |
|          | 1367                    | 1373         | 1325         | 1350         | Ring semi-circle<br>stretch                                               |
|          | 1336                    |              |              |              |                                                                           |
| 1193     |                         |              |              |              |                                                                           |

|      |      |      |      |     |                                                              |
|------|------|------|------|-----|--------------------------------------------------------------|
| 1172 | 1168 | 1172 | 1004 |     | Ring semi-circle stretch+NH <sub>2</sub> rock                |
|      |      | 1145 |      |     | Ring semi-circle stretch                                     |
| 1022 | 1014 | 979  |      |     | Ring breath triazine ring, in phase radial                   |
| 815  |      |      |      | 802 | Ring out of plane bend                                       |
| 769  | 779  | 759  | 792  | 781 | Side chain out of plane bend +Ring-sextant out of plane bend |
| 730  |      |      |      |     | Side chain out of plane bend +Ring-sextant out of plane bend |
|      |      | 692  | 703  |     | Ring breath and NH <sub>2</sub> bend (out of plane)          |
|      | 655  |      |      |     | NH <sub>2</sub> wag                                          |
| 626  |      |      |      |     | Ring bend                                                    |
| 586  | 578  | 568  | 580  |     |                                                              |
| 464  | 495  | 501  |      | 472 | Combination tone: NH <sub>2</sub> bend+NH <sub>2</sub> rock  |
